# Supplementary material for: Prevalence of Pleural Effusion over Eight Years among Egyptian Children in the Delta region: A Single Center Cross-Section Study.
Source: Research Square preprint supplement (doi:10.21203/rs.3.rs-7447699/v1), 2025-10-06
Supplement: Supplementary file 1 [file 2d52c712c4024f60dc1e0b6a.docx]

**Table 4.1.** Pleural fluid analysis among the studied cases.

| Variables | The studied group (n=160) |
| --- | --- |
| Type of fluid  Not assessed (Conservative treatment)  Exudate  Transudate | 43 (26.9%)  103 (64.4%)  14 (8.8%) |
| Appearance  Turbid  Pus  Clear  Reddish  N/A | 72 (45.0%)  12 (7.5%)  3 (1.9%)  7 (4.4%)  66 (41.3%) |
| WBCs  Mean ± SD  (Min-Max) | 18651.4±38680.5  (0-184000) |
| Protein  Mean ± SD  (Min-Max) | 2314.72± 1588.39  (100-6235) |
| Glucose  Mean ± SD  (Min-Max) | 42.29±28.82  (0-120.0) |

- MRSA = methicillin-resistant Staphylococcus aureus; N/A = not assessed.
- Continuous data are expressed as mean ± SD and range and categorical data are expressed as n (%).

**Table 4.2.** Pleural fluid analysis among the studied cases.

| Variables | The studied group (n=160) |
| --- | --- |
| Pleural culture results:  Non-assessed (N/A)  Tested  Staph coagulase positive  Staph coagulase negative  Gram negative Bacilli  Strept pneumonia (diplococci)  No growth | 46 (28.7%)  114 (71.3)  18 (15.8%)  1(0.9%)  3(2.6%)  5(4.4%)  87(76.3%) |
| Blood Culture results  Staph coagulase positive  Gram negative Bacilli  Klebsiella  Enterobacter  Micrococci  MRSA  No growth | 23 (14.4%)  1(0.6%)  1(0.6%)  2(1.3%)  1(0.6%)  1(0.6%)  131 (81.9%) |

- MRSA = methicillin-resistant Staphylococcus aureus; N/A = not assessed.
- Continuous data are expressed as mean ± SD and range and categorical data are expressed as n (%).
