# Supplementary material for: Prevalence of Pleural Effusion over Eight Years among Egyptian Children in the Delta region: A Single Center Cross-Section Study.
Source: Research Square preprint supplement (doi:10.21203/rs.3.rs-7447699/v1), 2025-10-06
Supplement: Supplementary file 2 [file 4e93d9f44c0675a36848f05a.docx]

**Table 3.** Laboratory investigations of pleural effusion among the studied cases.

| Laboratory investigations | The studied group (n=160) |
| --- | --- |
| Hb (g/dl)  Mean ± SD  (Min-Max) | 10±1.6  (6.0-15.0) |
| WBC (k/ul)  Mean ± SD  (Min-Max) | 18.5±13.8  (0.7-122) |
| Neutrophil (k/ul)  Mean ± SD  (Min-Max) | 11.7±8.7  (0.20-54) |
| Lymphocytes (k/ul)  Mean ± SD  (Min-Max) | 4.81±6.09  (0.2-70) |
| Platelets (k/ul)  Mean ± SD  (Min-Max) | 527.3±277.0  (33-1440) |
| Eosinophils  Mean ± SD  (Min-Max) | 0.12±0.19  (0-1.1) |
| CRP (mg/L)  Mean ± SD  (Min-Max) | 107.7±191.4  (0-2122) |
| ESR  Mean ± SD  (Min-Max) | 76.49±35.23  (10-160) |

- Hb = hemoglobin; WBC = white blood cell; PLT = platelet count; CRP = C-reactive protein; ESR = erythrocyte sedimentation rate.
- Continuous data are expressed as mean ± SD and range.
- The majority of the case showed elevated **neutrophil count (11.75 ± 8.70 ×10⁹/L), thrombocytosis (527.31 ± 277.06 ×10⁹/L), CRP (107.76 mg/L)** with a range of 0.00 to 2122.00 mg/L**, and ESR (76.49 mm/hr)**, ranging from 10.00 to 160.00.
