# Supplementary material for: Prevalence of Pleural Effusion over Eight Years among Egyptian Children in the Delta region: A Single Center Cross-Section Study.
Source: Research Square preprint supplement (doi:10.21203/rs.3.rs-7447699/v1), 2025-10-06
Supplement: Supplementary file 3 [file 977366a31f2a6f34e3849dd1.docx]

**Table 2.** Associated comorbidities and risk factors of pleural effusion among the studied cases.

| - Associated comorbidities | | |
| --- | --- | --- |
| Children characteristics | The studied group (n=160) | |
| **N** | **%** |
| Hematological or Oncology disease | 13 | 8.1 |
| Cardiac disease | 9 | 5.6 |
| Asthma | 3 | 1.9 |
| Immunodeficiency disease | 2 | 1.3 |
| Neurological disease | 1 | 0.6 |
| - Risk factors | | |
| NICU admission by respiratory problem | 27 | 16.9 |
| Recurrent hospital admission | 40 | 25 |
| Pneumococcal vaccination | 0 | 0 |

- Data are presented as n (%).
- NICU = neonatal intensive care unit.
