# Supplementary material for: Prevalence of Pleural Effusion over Eight Years among Egyptian Children in the Delta region: A Single Center Cross-Section Study.
Source: Research Square preprint supplement (doi:10.21203/rs.3.rs-7447699/v1), 2025-10-06
Supplement: Supplementary file 4 [file f1e481bc03af42441ff8d8aa.docx]

**Table 1.** Clinical findings and complications of pleural effusion cases:

| - Clinical findings: | | |
| --- | --- | --- |
| Children characteristics | The studied group (n=160) | |
| **N** | **%** |
| Fever | 148 | 92.5 |
| RD degree  I  II  III  IV | 27  48  55  30 | 16.9  30.0  34.4  18.8 |
| Bronchial breathing | 47 | 29.4 |
| Diminished breath sound | 137 | 85.6 |
| Rales | 22 | 13.8 |
| Wheezes | 2 | 1.3 |
| Other symptoms  Vomiting  Abdominal pain  B symptoms  Orthopnea  Dysphagia \ uncontrolled DM  Anorexia  Otitis media  Arthralgia | 10  23  8  2  1  1  1  1 | 6.3  14.4  5  1.3  0.6  0.6  0.6  0.6 |
| - Associated complications: | | |
| Loculation and septations | 22 | 13.8 |
| Pneumothorax | 10 | 6.3 |
| Septicemia | 11 | 6.9 |

- RD degree: respiratory distress.
- Data are presented as n (%).
- B symptoms: fever, night sweating and weight loss.
