# Supplementary material for: Prevalence of Pleural Effusion over Eight Years among Egyptian Children in the Delta region: A Single Center Cross-Section Study.
Source: Research Square preprint supplement (doi:10.21203/rs.3.rs-7447699/v1), 2025-10-06
Supplement: Supplementary file 5 [file fb3a794a2de80a3fcd3eae88.docx]

**Table 5.** Radiologic findings in pleural effusion cases.

| Children characteristics | The studied group (n=160) | |
| --- | --- | --- |
| **N** | **%** |
| Lobar pneumonia | 70 | 43.8 |
| Bronchopneumonia | 10 | 6.3 |
| Pneumothorax | 10 | 6.3 |
| Consolidation collapse | 65 | 40.6 |
| GGO | 1 | 0.6 |
| Aspiration pneumonia | 1 | 0.6 |
| Other radiological finding  Rib fracture  Mediastinal mass  Pericardial effusion  Hepatomegally-spleenomegally  Cardiomegaly  Lymphatic obstruction  Ascites  Hydrocephalous with VP Shunt | 3  10  1  1  3  1  1  1 | 0.9  6.3  0.6  0.6  1.9  0.6  0.6  0.6 |
| Amount of effusion  Moderate  Mild  Marked | 75  46  39 | 46.9  28.7  24.4 |
| Site  Rt  Lt  Bilateral | 83  63  14 | 51.9  39.4  8.8 |

- Data are presented as n (%).
- GGO: ground glass opacity. VP shunt: ventricle-peritoneal shunt
