# Supplementary material for: Prevalence of Pleural Effusion over Eight Years among Egyptian Children in the Delta region: A Single Center Cross-Section Study.
Source: Research Square preprint supplement (doi:10.21203/rs.3.rs-7447699/v1), 2025-10-06
Supplement: Supplementary file 6 [file ff4e96afe5fe452f342c88af.docx]

**Table 6.** Medical and interventional treatment among the cohort.

| - Medical treatment | | |
| --- | --- | --- |
| Treatment | The studied group (n=160) | |
| **N** | **%** |
| Ampicillin | 96 | 60 |
| Cephalosporines | 103 | 64.4 |
| Macrolides | 6 | 3.8 |
| Aminoglycoside | 4 | 2.5 |
| Vancomycin | 33 | 20.6 |
| Linezolid | 33 | 20.6 |
| Clindamycin | 9 | 5.6 |
| Meropenem | 61 | 38.1 |
| - Interventional treatment | | |
| Chest tube insertion | 118 | 73.8% |
| Surgical interference (Decortication – VATS) | 11 | 6.9% |
| O2 support | 28 | 17.5% |

- Data are presented as n (%).
- VATS: Video-Assisted Thoracoscopic Surgery. O2: oxygen.
